# Supplementary material
Source: PubMed Central journal article supplement (PMC3200567)
Supplement: NIHMS302569-supplement-Appendix.pdf [file NIHMS302569-supplement-Appendix.pdf]

**SAMPLE: DO NOT FAX TO DATAFAX**

HPTN 058 (123)

ICS-1 (055)

**Participant ID**

-       -   
 Site Number                      Participant Number                      Chk

**Informed Consent for Enrollment Evaluation Survey**

**Survey Completion Date**

             
*dd*                      *MMM*                      *yy*

**Staff administering survey:** \_\_\_\_\_

**Instructions:** I would like to ask you questions about how you felt when you took the comprehension quiz earlier today. Unlike before, there are no correct or incorrect answers to the questions I am going to ask you. Please know that your answers to this survey do not affect your participation in the trial. We are asking you these questions only because we want to know how it felt to be asked questions about the trial after the informed consent process.

1. Would that be OK? .....  *yes*     *no* → **If no, end of form.**

To begin, I am going to ask you six questions about how you felt when taking the comprehension quiz. After each question, please tell me if you felt that way or not. You can respond by saying that you strongly disagree, disagree, neither disagree or agree, agree, or strongly agree with the statement.

2. When taking the comprehension quiz:

|                                        | <i>strongly disagree</i> | <i>disagree</i>          | <i>neither disagree or agree</i> | <i>agree</i>             | <i>strongly agree</i>    |
|----------------------------------------|--------------------------|--------------------------|----------------------------------|--------------------------|--------------------------|
| 2a. you were anxious .....             | <input type="checkbox"/> | <input type="checkbox"/> | <input type="checkbox"/>         | <input type="checkbox"/> | <input type="checkbox"/> |
| 2b. you did not mind .....             | <input type="checkbox"/> | <input type="checkbox"/> | <input type="checkbox"/>         | <input type="checkbox"/> | <input type="checkbox"/> |
| 2c. you were bored .....               | <input type="checkbox"/> | <input type="checkbox"/> | <input type="checkbox"/>         | <input type="checkbox"/> | <input type="checkbox"/> |
| 2d. you were irritated .....           | <input type="checkbox"/> | <input type="checkbox"/> | <input type="checkbox"/>         | <input type="checkbox"/> | <input type="checkbox"/> |
| 2e. you found the questions easy ..... | <input type="checkbox"/> | <input type="checkbox"/> | <input type="checkbox"/>         | <input type="checkbox"/> | <input type="checkbox"/> |
| 2f. you felt pressured .....           | <input type="checkbox"/> | <input type="checkbox"/> | <input type="checkbox"/>         | <input type="checkbox"/> | <input type="checkbox"/> |

**Instructions:** I am now going to ask you two more questions. The responses are the same as before.

|                                                                                                                         | <i>strongly disagree</i> | <i>disagree</i>          | <i>neither disagree or agree</i> | <i>agree</i>             | <i>strongly agree</i>    |
|-------------------------------------------------------------------------------------------------------------------------|--------------------------|--------------------------|----------------------------------|--------------------------|--------------------------|
| 3. Taking the comprehension quiz made you feel like the researchers really wanted you to understand the clinical trial: | <input type="checkbox"/> | <input type="checkbox"/> | <input type="checkbox"/>         | <input type="checkbox"/> | <input type="checkbox"/> |
| 4. Testing is a good way to find out if a person really understands the clinical trial: .....                           | <input type="checkbox"/> | <input type="checkbox"/> | <input type="checkbox"/>         | <input type="checkbox"/> | <input type="checkbox"/> |

01-DEC-08

**SAMPLE**

Language

\_\_\_\_\_  
Staff Initials / Date
